# Supplementary material for: Community Willingness to Participate in a Dengue Study in Aceh Province, Indonesia
Source: PLOS journal article supplement (doi:10.1371/journal.pone.0159139), 2016-07-12
Supplement: S1 (10.1371/journal.pone.0159139.s001) [file journal.pone.0159139.s001.PDF]

**S1 Table. Indicator assets used for constructing the asset index (socioeconomic status) of participants**

| Variables                                     | Score |
|-----------------------------------------------|-------|
| Piped-water                                   | 1     |
| Toilets                                       | 1     |
| Radio                                         | 1     |
| Landline phone                                | 1     |
| Refrigerator                                  | 1     |
| Personal computer                             | 1     |
| Bicycle                                       | 1     |
| Motorcycle                                    | 1     |
| Car                                           | 1     |
| Internet connection                           | 1     |
| Own the housing unit                          | 1     |
| Having a separate room functioning as kitchen | 1     |
| The house is built with non-dirt flooring     | 1     |
| The house is built with roof tiles            | 1     |
| The house is built with brick walls           | 1     |
