# Supplementary material for: Community Willingness to Participate in a Dengue Study in Aceh Province, Indonesia
Source: PLOS journal article supplement (doi:10.1371/journal.pone.0159139), 2016-07-12
Supplement: S2 (10.1371/journal.pone.0159139.s002) [file journal.pone.0159139.s002.PDF]

**S2 Table (A). Questions used for assessing the knowledge regarding dengue**

| Variables                                                                                                                 |
|---------------------------------------------------------------------------------------------------------------------------|
| Dengue is caused by a virus. <i>Yes</i>                                                                                   |
| Can all mosquitoes transmit dengue virus? <i>No</i>                                                                       |
| Do the <i>Aedes</i> mosquitoes transmit dengue virus? <i>Yes</i>                                                          |
| Do flies transmit dengue virus? <i>No</i>                                                                                 |
| Do ticks transmit dengue virus? <i>No</i>                                                                                 |
| Does casual person to person contact transmit DF? <i>No</i>                                                               |
| Is dengue virus transmitted through food and water? <i>No</i>                                                             |
| Do mosquitoes breed in standing water? <i>Yes</i>                                                                         |
| Do windows screens and bed net reduce mosquitoes? <i>Yes</i>                                                              |
| Do insecticides sprays (such as Baygon) reduce mosquitoes and prevent DF? <i>Yes</i>                                      |
| Do tightly covering water containers reduce mosquitoes? <i>Yes</i>                                                        |
| Do mosquito repellents prevent mosquito bites? <i>Yes</i>                                                                 |
| Does dengue virus transmitted to humans by the bite of female <i>Aedes</i> mosquitoes that have been infected? <i>Yes</i> |
| Is the rainy season the only season when DF present? <i>No</i>                                                            |
| Can you identify <i>Aedes</i> mosquitoes? <i>Yes</i>                                                                      |
| When are the <i>Aedes</i> mosquitoes most likely to feed/bite? <i>Day time</i>                                            |
| Is headache a symptom of DF? <i>Yes</i>                                                                                   |
| Is joint pain a symptom of DF? <i>Yes</i>                                                                                 |
| Is muscle pain a symptom of DF? <i>Yes</i>                                                                                |
| Is pain behind the eye a symptom of DF? <i>Yes</i>                                                                        |
| Is bone sore a symptom of DF? <i>Yes</i>                                                                                  |
| Are nausea/vomiting symptoms of DF? <i>Yes</i>                                                                            |
| Is rash a symptom of DF? <i>Yes</i>                                                                                       |
| Is diarrhea common in DF? <i>Yes</i>                                                                                      |
| Is stomach pain common in DF? <i>Yes</i>                                                                                  |
| Is gums bleeding common in DF? <i>Yes</i>                                                                                 |
| Can a person be suffered from DF more than once? <i>Yes</i>                                                               |
| Does DF affect infants, children and adults? <i>Yes</i>                                                                   |



**S2 Table (B). Questions used for assessing the attitude regarding dengue**

| Variables                                                                                                                                                                     |
|-------------------------------------------------------------------------------------------------------------------------------------------------------------------------------|
| Is DF a serious illness? <i>Strongly agree or Agree</i>                                                                                                                       |
| Are you at risk of getting DF? <i>Strongly agree or Agree</i>                                                                                                                 |
| Can DF be prevented? <i>Strongly agree or Agree</i>                                                                                                                           |
| Is controlling the breeding places of mosquitoes a good strategy to prevent DF? <i>Strongly agree or Agree</i>                                                                |
| Do you think that stagnant water around the houses in discarded tyres, broken pots and bottles are breeding places of <i>Aedes</i> mosquitoes? <i>Strongly agree or Agree</i> |
| Do you think communities should actively participate in controlling the vectors of DF. <i>Strongly agree or Agree</i>                                                         |
| Everyone has a chance to be suffered from DF. <i>Strongly agree or Agree</i>                                                                                                  |
| If you experience signs and symptoms of DF, you would immediately come to Community Health Centre. <i>Strongly agree or Agree</i>                                             |
| You are the key individuals in preventing DF. <i>Strongly agree or Agree</i>                                                                                                  |
| All DF patients have a chance for a full recovery. <i>Strongly agree or Agree</i>                                                                                             |
| The government is doing their best to prevent DF. <i>Strongly agree or Agree</i>                                                                                              |
| Your neighborhood is a DF high-risk area. <i>Strongly agree or Agree</i>                                                                                                      |
| Community members are capable of preventing DF. <i>Strongly agree or Agree</i>                                                                                                |
| You are capable of preventing DF. <i>Strongly agree or Agree</i>                                                                                                              |
| Government actions are needed for DF prevention. <i>Strongly agree or Agree</i>                                                                                               |



**S2 Table (C). Questions used for assessing practice regarding dengue prevention**

| Variables                                                                                                       |
|-----------------------------------------------------------------------------------------------------------------|
| Use screen windows to reduce mosquitoes. <i>Yes</i>                                                             |
| Prevent water stagnation. <i>Yes</i>                                                                            |
| Cut down bushes in the yard to reduce mosquitoes. <i>Yes</i>                                                    |
| Use mosquito eating fish to reduce mosquitoes. <i>Yes</i>                                                       |
| Cleaning of garbage/trash. <i>Yes</i>                                                                           |
| Disposing water holding containers such as tires, parts of automobiles, plastic bottles, crack pots. <i>Yes</i> |
| Use of fan to prevent mosquito biting. <i>Yes</i>                                                               |
| Covering body with clothes when working in the bush, farm or forest. <i>Yes</i>                                 |
| Cover water containers in the home. <i>Yes</i>                                                                  |
| Change the water plant containers in the house every week. <i>Yes</i>                                           |
| Change the water in flower containers. <i>Yes</i>                                                               |
| Check the waste / garbage that can block the flow of water around home. <i>Yes</i>                              |
| Participate in any of the dengue infection campaign in the community. <i>Yes</i>                                |
| Check and clean the drains / gutters roofs of the rainy season. <i>Yes</i>                                      |
| Use bed net when sleeping during day. <i>Yes</i>                                                                |
| Frequently cleaning water filled containers and ditches around the house. <i>More than once per week</i>        |
